# Supplementary material for: The odd–even effect of alkyl chain in organic room temperature phosphorescence luminogens and the corresponding in vivo imaging
Source: Royal Society of Chemistry journal article supplement (doi:10.1039/c9qm00108e), 2019-01-01
Supplement: c9qm00108e1.pdf [file c9qm00108e1.pdf]

## Electronic Supporting Information

### The odd-even effect of alkyl chain in organic room temperature phosphorescence luminogens and the corresponding *in vivo* imaging

Jie Yang,<sup>#ab</sup> Heqi Gao,<sup>#c</sup> Yunsheng Wang,<sup>a</sup> Yun Yu,<sup>b</sup> Yanbin Gong,<sup>b</sup> Manman Fang,<sup>ab</sup> Dan Ding,<sup>\*c</sup> Wenping Hu,<sup>a</sup> Ben Zhong Tang,<sup>ad</sup> and Zhen Li<sup>\*ab</sup>

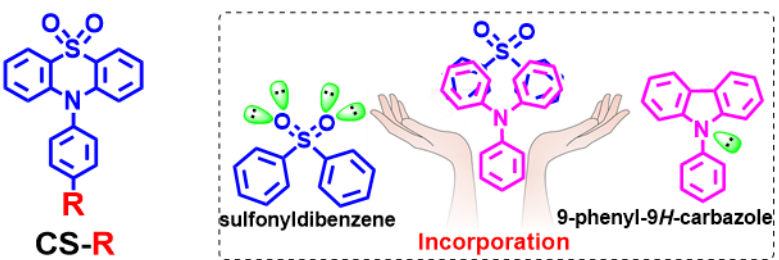

The diagram shows the chemical structure of CS-R (10-phenyl-10H-phenothiazine 5,5-dioxide derivative) and a schematic of the 'Incorporation' process. The incorporation involves the reaction of sulfonyldibenzene and 9-phenyl-9H-carbazole to form the CS-R structure.

| R                       | OCH <sub>3</sub>    | CH <sub>3</sub>    | H      | Br     | Cl     | F      |
|-------------------------|---------------------|--------------------|--------|--------|--------|--------|
| Abbreviation            | CS-OCH <sub>3</sub> | CS-CH <sub>3</sub> | CS-H   | CS-Br  | CS-Cl  | CS-F   |
| $\tau$ (solid, RT)      | 88 ms               | 96 ms              | 188 ms | 268 ms | 256 ms | 410 ms |
| $\lambda_p$ (solid, RT) | 509 nm              | 516 nm             | 525 nm | 525 nm | 500 nm | 483 nm |

**Chart S1** The previous work based on 10-phenyl-10H phenothiazine 5,5-dioxide derivatives with RTP effect.

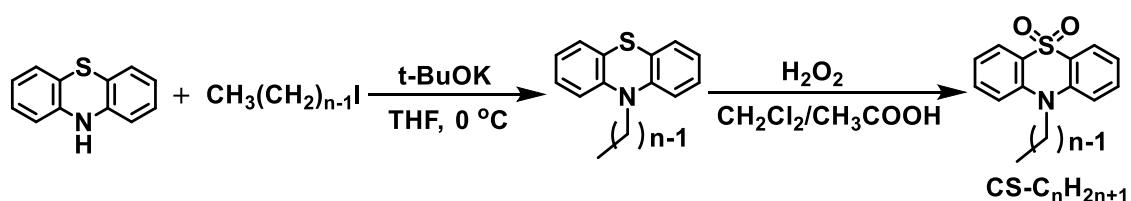

**Scheme S1** The synthetic routes of the six target luminogens.

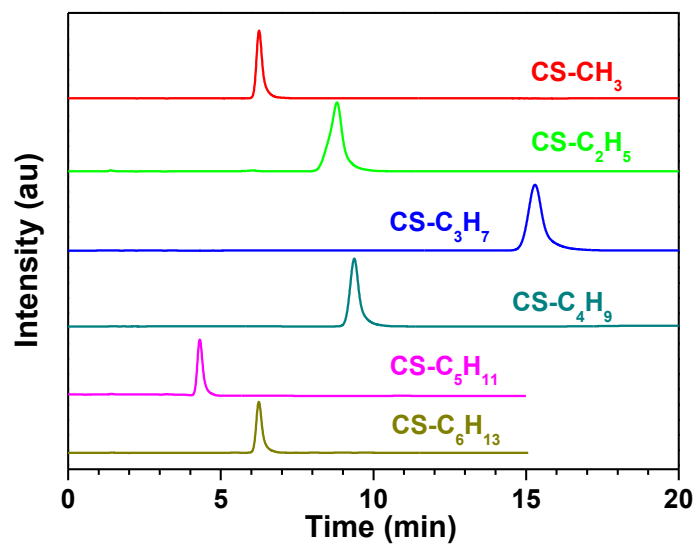

**Figure S1** HPLC spectra of the six target compounds.

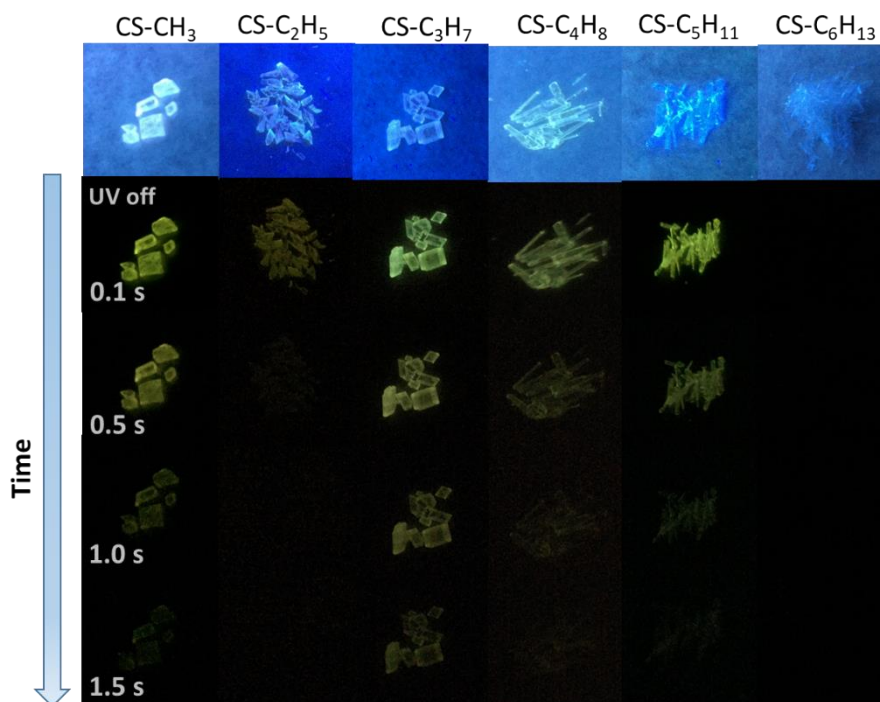

**Figure S2** The RTP behaviors of the six luminogens.

**Table S1** The photophysical data of CS-CH<sub>3</sub>, CS-C<sub>2</sub>H<sub>5</sub>, CS-C<sub>3</sub>H<sub>7</sub>, CS-C<sub>4</sub>H<sub>9</sub>, CS-C<sub>5</sub>H<sub>11</sub> and CS-C<sub>6</sub>H<sub>13</sub> in solutions and crystals.

| Compound                          | $\lambda_{\text{abs}}^{\text{a}}$<br>(nm) | $\lambda_{\text{F}}^{\text{b}}$<br>(nm) | $\tau_{\text{F}}^{\text{b}}$<br>(ns) | $\lambda_{\text{P}}^{\text{b}}$<br>(nm) | $\tau_{\text{P}}^{\text{b}}$<br>(ms) | $\lambda_{\text{P}}^{\text{c}}$<br>(nm) | $\tau_{\text{P}}^{\text{c}}$<br>(ms) | $\Phi_{\text{PL}}^{\text{b}}$<br>(%) |
|-----------------------------------|-------------------------------------------|-----------------------------------------|--------------------------------------|-----------------------------------------|--------------------------------------|-----------------------------------------|--------------------------------------|--------------------------------------|
| CS-CH <sub>3</sub>                | 332                                       | 384                                     | 0.99                                 | 515                                     | 245                                  | 396,405                                 | 253                                  | 3.83                                 |
| CS-C <sub>2</sub> H <sub>5</sub>  | 335                                       | 398                                     | 0.65                                 | 476,515                                 | 92                                   | 393,407                                 | 273                                  | 3.50                                 |
| CS-C <sub>3</sub> H <sub>7</sub>  | 335                                       | 385                                     | 0.90                                 | 414,435,490                             | 327                                  | 395,407                                 | 268                                  | 5.68                                 |
| CS-C <sub>4</sub> H <sub>9</sub>  | 335                                       | 385                                     | 0.71                                 | 509                                     | 181                                  | 391,407                                 | 269                                  | 2.99                                 |
| CS-C <sub>5</sub> H <sub>11</sub> | 336                                       | 382                                     | 0.66                                 | 415,442,516                             | 205                                  | 395,405                                 | 246                                  | 5.51                                 |
| CS-C <sub>6</sub> H <sub>13</sub> | 336                                       | 378                                     | 0.86                                 | 510                                     | /                                    | 391,406                                 | 249                                  | 2.93                                 |

<sup>a</sup> Observed from absorption spectra in dilute dichloromethane solution. <sup>b</sup> Determined in crystal at room temperature. <sup>c</sup> Determined in solution at 77K.

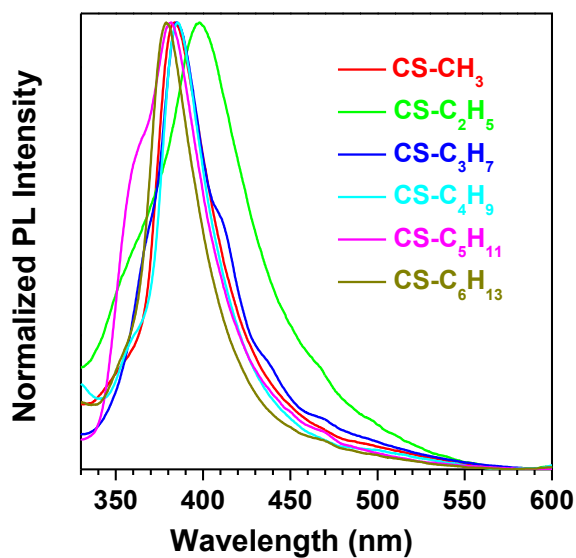

**Figure S3** The normalized fluorescence spectra of the six luminogens in crystal state.

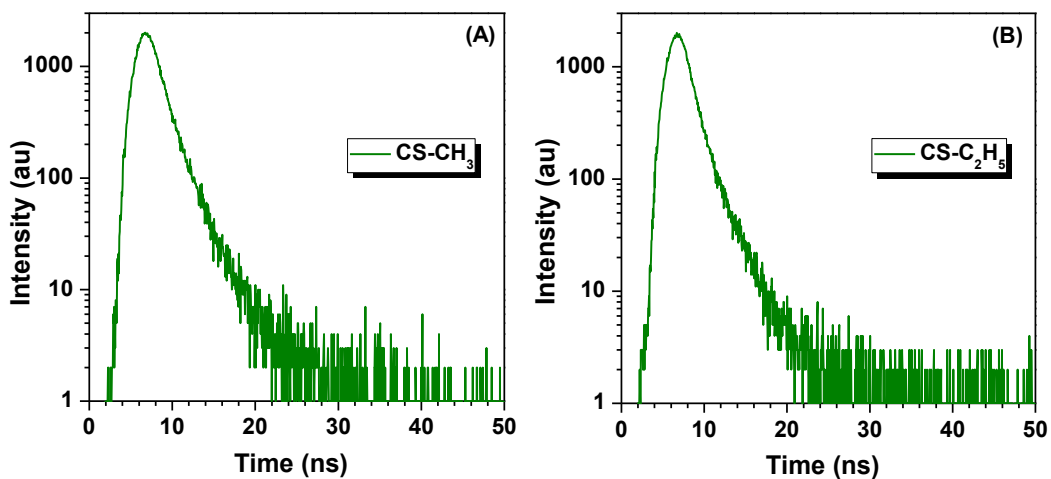

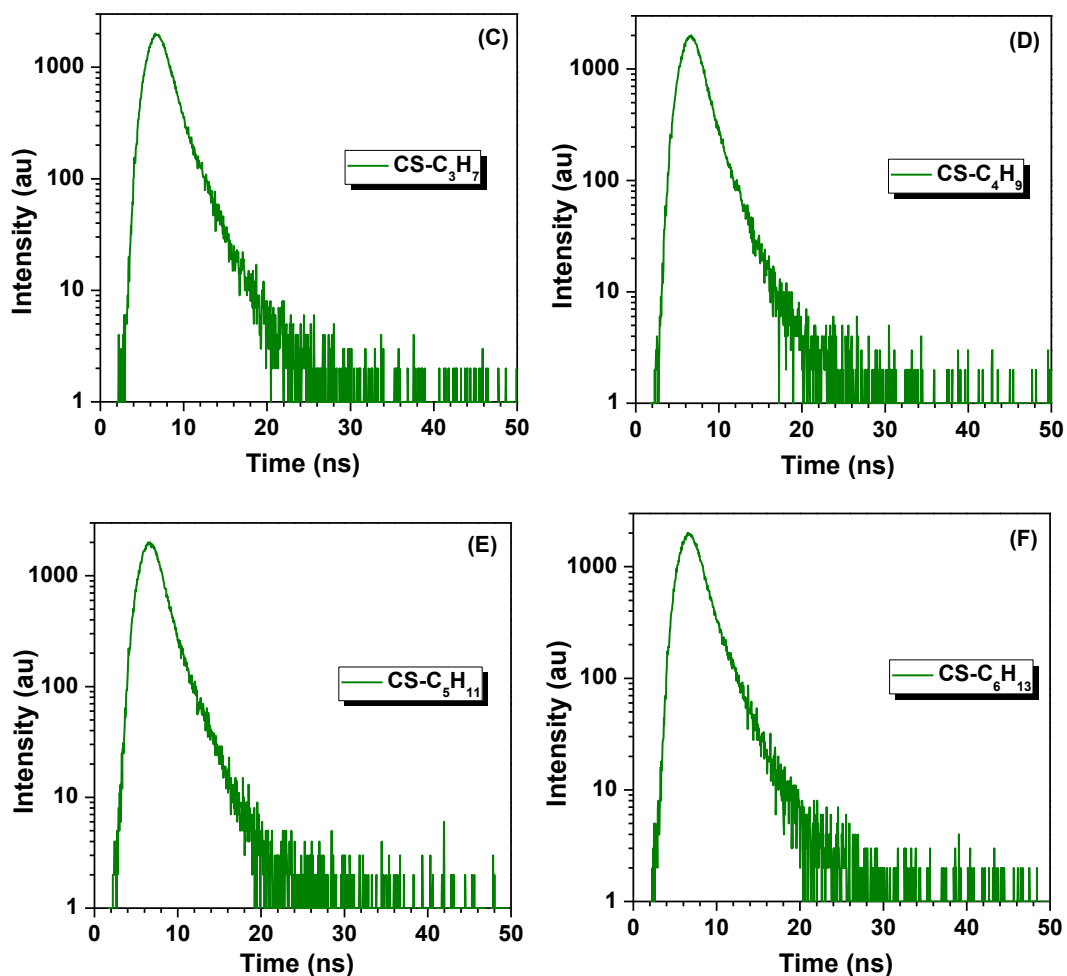

**Figure S4** Time-resolved PL-decay curves for their fluorescence in crystal state of CS-CH<sub>3</sub> @384 nm (A), CS-C<sub>2</sub>H<sub>5</sub> @398 nm (B), CS-C<sub>3</sub>H<sub>7</sub> @385 nm (C), CS-C<sub>4</sub>H<sub>9</sub> @385 nm (D), CS-C<sub>5</sub>H<sub>11</sub> @382 nm (E) and CS-C<sub>6</sub>H<sub>13</sub> @378 nm (F).

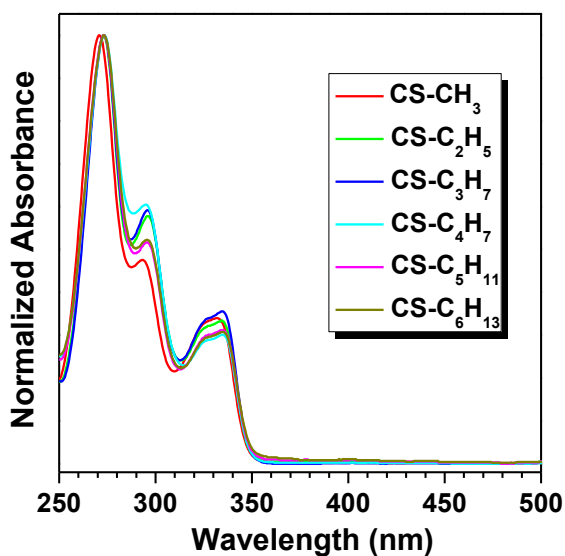

**Figure S5** The UV-visible absorption spectra of the six luminogens in THF solutions.

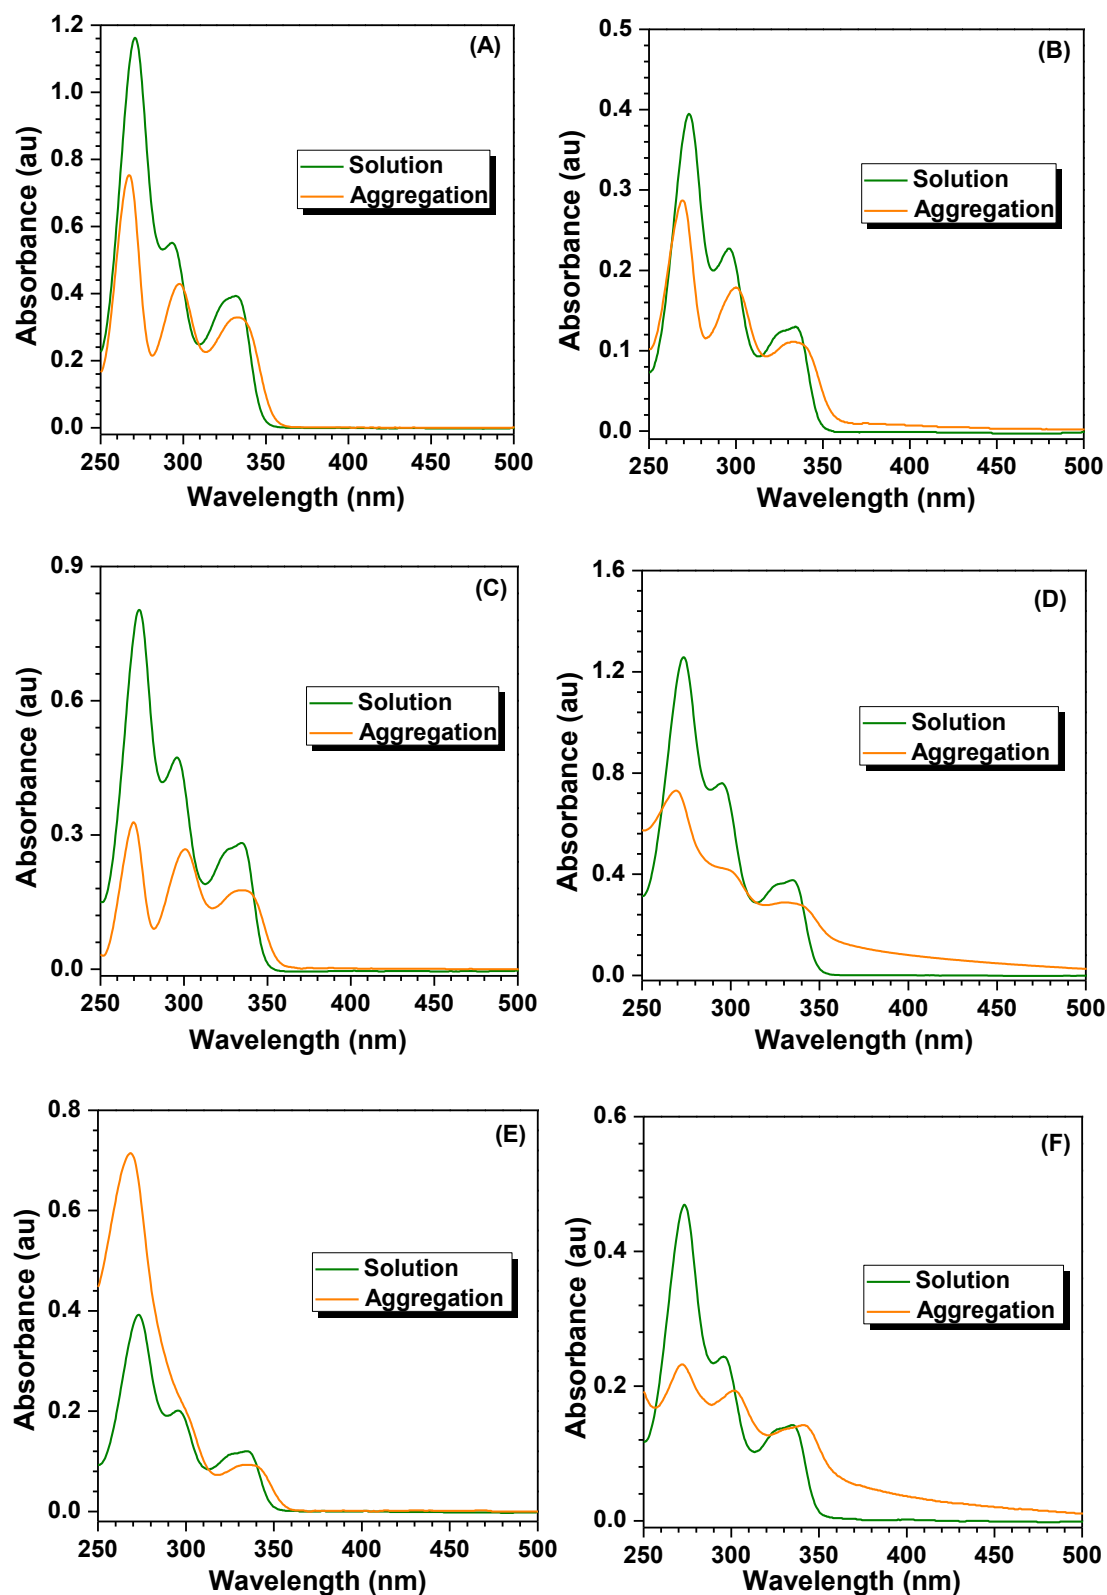

**Figure S6** The UV-visible absorption spectra of THF solutions and aggregations (THF/water mixtures with  $f_{\text{water}} = 99\%$ ) of CS-CH<sub>3</sub> (A), CS-C<sub>2</sub>H<sub>5</sub> (B), CS-C<sub>3</sub>H<sub>7</sub> (C), CS-C<sub>4</sub>H<sub>9</sub> (D), CS-C<sub>5</sub>H<sub>11</sub> (E) and CS-C<sub>6</sub>H<sub>13</sub> (F).

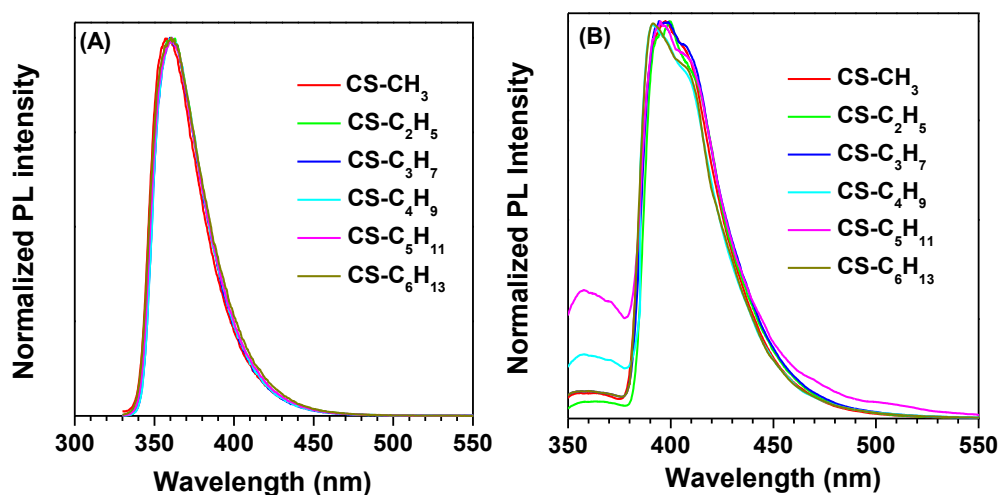

**Figure S7** (A) Steady-state photoluminescence spectra of the six target luminogens in THF solution at room temperature; (B) Steady-state photoluminescence spectra of the six target luminogens in dichloromethane solution at 77K, concentration:  $10^{-5}$  M.

**Table S2** Structural data of single crystals of CS-CH<sub>3</sub>, CS-C<sub>2</sub>H<sub>5</sub>, CS-C<sub>3</sub>H<sub>7</sub>, CS-C<sub>4</sub>H<sub>9</sub>, CS-C<sub>5</sub>H<sub>11</sub> and CS-C<sub>6</sub>H<sub>13</sub>.

| Name                                                   | CS-CH <sub>3</sub>                                   | CS-C <sub>2</sub> H <sub>5</sub>                   | CS-C <sub>3</sub> H <sub>7</sub>                                   | CS-C <sub>4</sub> H <sub>9</sub>                    | CS-C <sub>5</sub> H <sub>11</sub>                  | CS-C <sub>6</sub> H <sub>13</sub>                 |
|--------------------------------------------------------|------------------------------------------------------|----------------------------------------------------|--------------------------------------------------------------------|-----------------------------------------------------|----------------------------------------------------|---------------------------------------------------|
| Formula                                                | C <sub>13</sub> H <sub>11</sub> NO <sub>2</sub> S    | C <sub>14</sub> H <sub>13</sub> NO <sub>2</sub> S  | C <sub>15</sub> H <sub>15</sub> NO <sub>2</sub> S                  | C <sub>16</sub> H <sub>17</sub> NO <sub>2</sub> S   | C <sub>17</sub> H <sub>19</sub> NO <sub>2</sub> S  | C <sub>18</sub> H <sub>21</sub> NO <sub>2</sub> S |
| Wavelength (Å)                                         | 0.71073                                              | 1.54184                                            | 1.54184                                                            | 1.54184                                             | 0.71073                                            | 0.71073                                           |
| Space Group                                            | P21/n                                                | P21/n                                              | P-1                                                                | P 21/c                                              | P21/n                                              | R3c                                               |
| Cell Lengths (Å)                                       | a=8.78316(19)<br>b=11.4642(2)<br>c=11.1048(2)        | a=7.9027(3)<br>b=11.1576(4)<br>c=13.5298(6)        | a=7.7584(7)<br>b=9.0839(8)<br>c=10.0043(9)                         | a=18.9325(7)<br>b=9.4253(3)<br>c=17.2146(6)         | a=11.377(3)<br>b=9.712(3)<br>c=13.362(4)           | a= 26.477(7)<br>b= 26.477(7)<br>c= 12.475(3)      |
| Cell Angles (°)                                        | $\alpha$ =90<br>$\beta$ =91.3006(19)<br>$\gamma$ =90 | $\alpha$ =90<br>$\beta$ =93.338(4)<br>$\gamma$ =90 | $\alpha$ =109.128(8)<br>$\beta$ =97.408(8)<br>$\gamma$ =103.752(8) | $\alpha$ =90<br>$\beta$ =114.976(4)<br>$\gamma$ =90 | $\alpha$ =90<br>$\beta$ =95.331(4)<br>$\gamma$ =90 | $\alpha$ =90<br>$\beta$ =90<br>$\gamma$ =120      |
| Cell Volume (Å <sup>3</sup> )                          | 1117.88(4)                                           | 1190.97(8)                                         | 630.39(10)                                                         | 2784.58(19)                                         | 1470.0(7)                                          | 7574(4)                                           |
| Z                                                      | 4                                                    | 4                                                  | 2                                                                  | 8                                                   | 4                                                  | 18                                                |
| Density (g/cm <sup>3</sup> )                           | 1.457                                                | 1.446                                              | 1.440                                                              | 1.371                                               | 1.362                                              | 1.245                                             |
| F(000)                                                 | 512.0                                                | 544.0                                              | 288.0                                                              | 1216.0                                              | 640.0                                              | 3024.0                                            |
| h <sub>max</sub> , k <sub>max</sub> , l <sub>max</sub> | 10,14,13                                             | 9,13,16                                            | 9,10,11                                                            | 22,11,20                                            | 15,13,18                                           | 32,32,15                                          |
| CCDC Number                                            | 1879164                                              | 1879165                                            | 1879166                                                            | 1879167                                             | 1879168                                            | 1879169                                           |

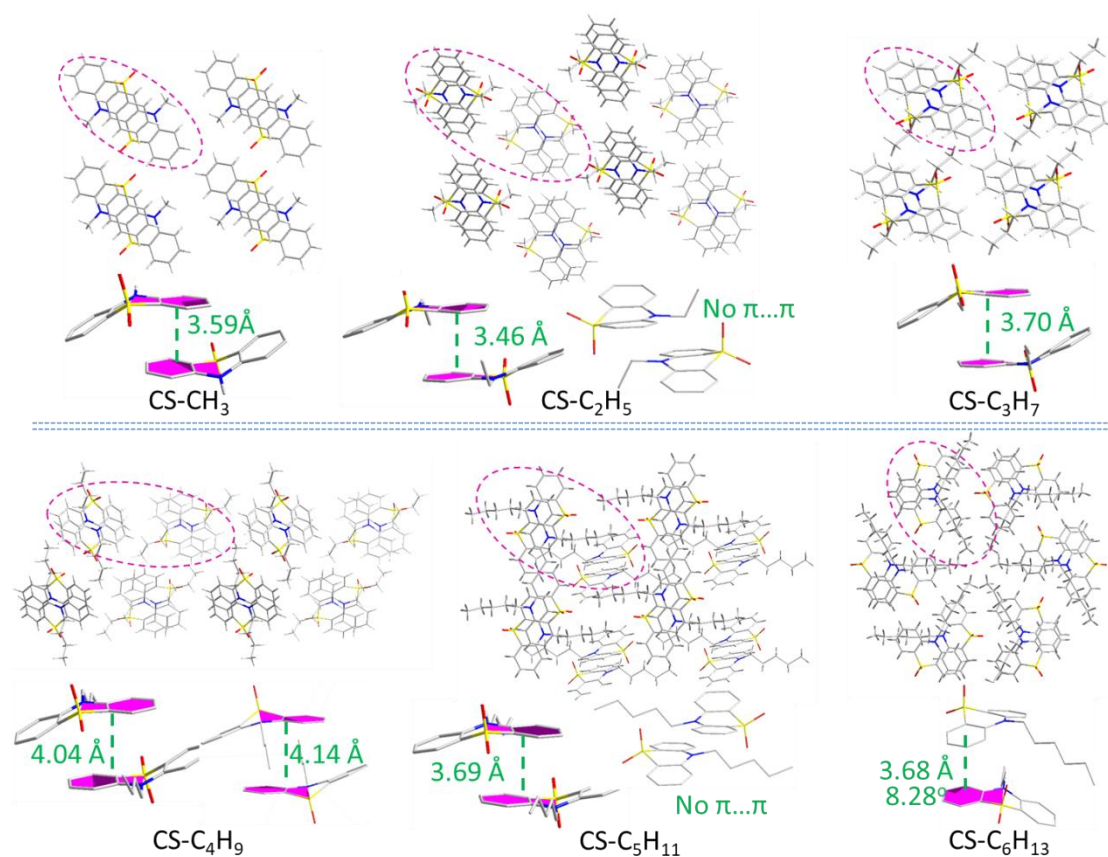

**Figure S8** Single-crystal structures of the six luminogens. Entire (upper) and local (down) packing modes of the crystals: the local packing pictures were selected from the parts in cycles of corresponding entire ones.

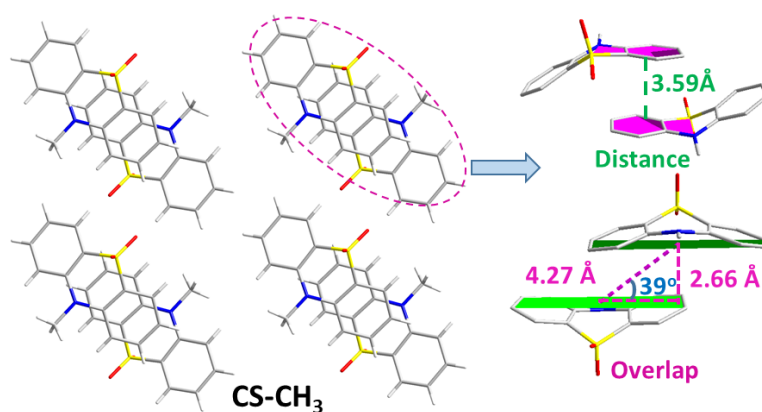

**Figure S9** Analyses of single crystal for CS-CH<sub>3</sub> with the  $\pi$ - $\pi$  distance and overlap labeled.



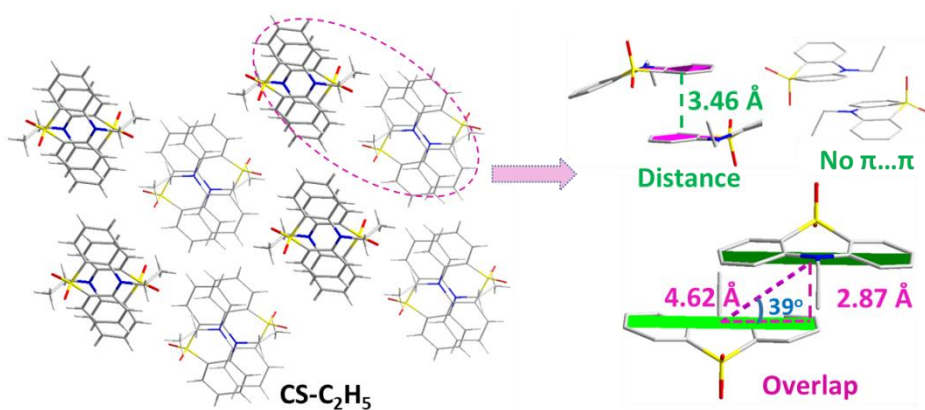

**Figure S10** Analyses of single crystal for CS-C<sub>2</sub>H<sub>5</sub> with the  $\pi$ - $\pi$  distance and overlap labeled.

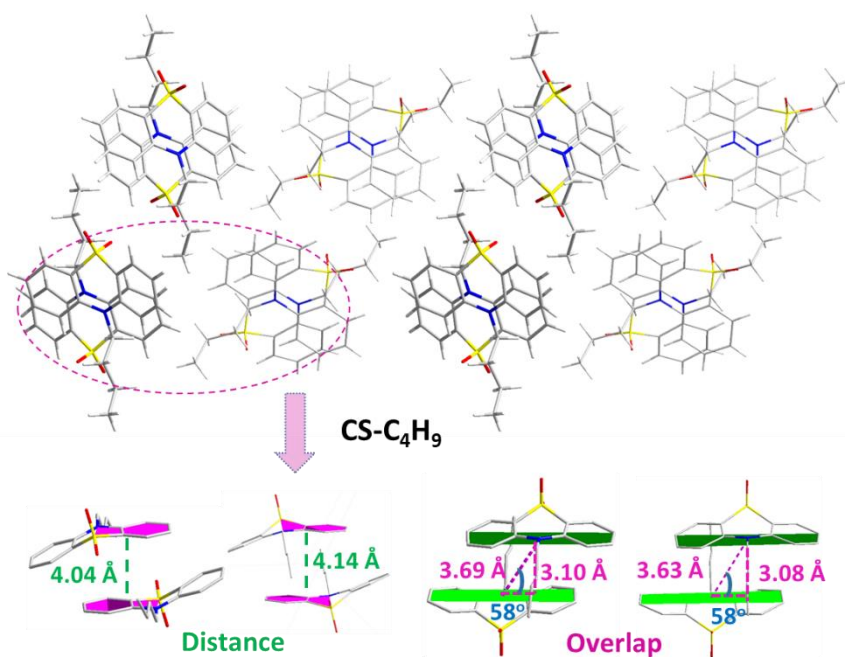

**Figure S11** Analyses of single crystal for CS-C<sub>4</sub>H<sub>9</sub> with the  $\pi$ - $\pi$  distance and overlap labeled.

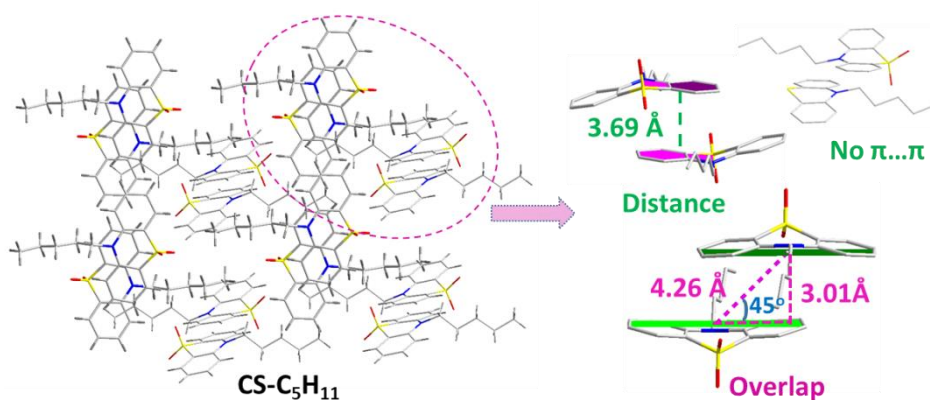

**Figure S12** Analyses of single crystal for CS-C<sub>5</sub>H<sub>11</sub> with the  $\pi$ - $\pi$  distance and overlap labeled.



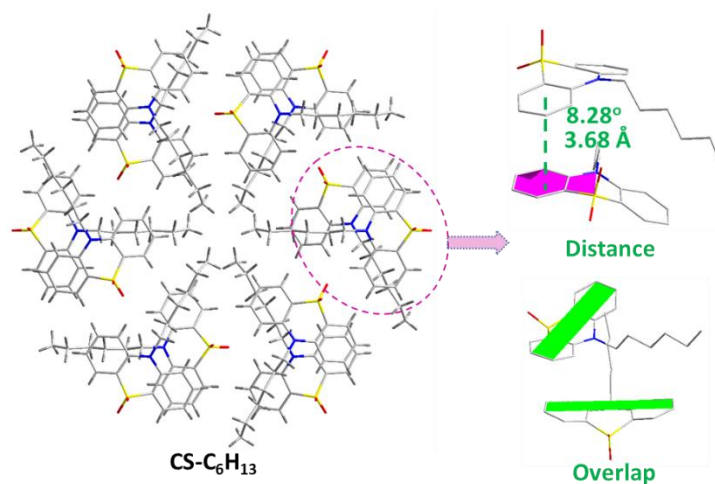

**Figure S13** Analyses of single crystal for CS-C<sub>6</sub>H<sub>13</sub> with the  $\pi$ - $\pi$  distance and overlap labeled.

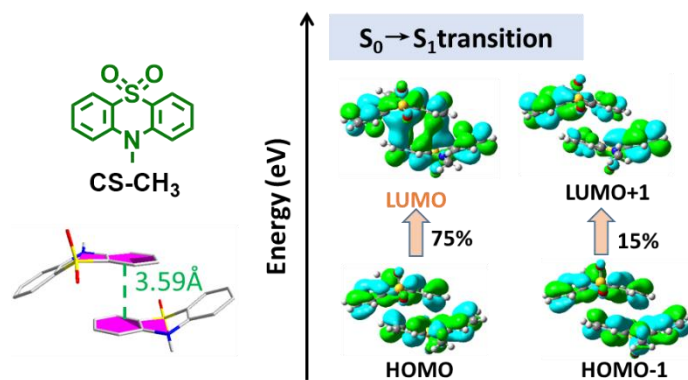

**Figure S14** The energy transitions for  $S_0$  to  $S_1$  state of CS-CH<sub>3</sub> estimated by TD-DFT calculations at the m062x/6-31g\* level and the frontier molecular orbitals with intermolecular interaction of  $\pi$ -electron cloud labeled in orange.

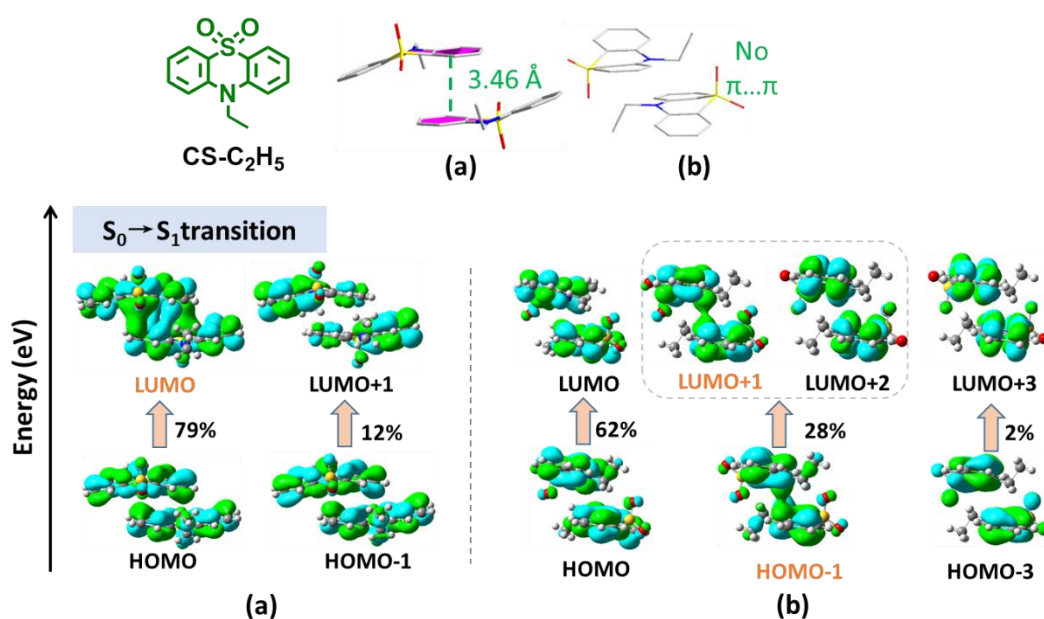

**Figure S15** The energy transitions for  $S_0$  to  $S_1$  state of CS-C<sub>2</sub>H<sub>5</sub> estimated by TD-DFT calculations

at the m062x/6-31g\* level and the frontier molecular orbitals with intermolecular interaction of  $\pi$ -electron cloud labeled in orange.

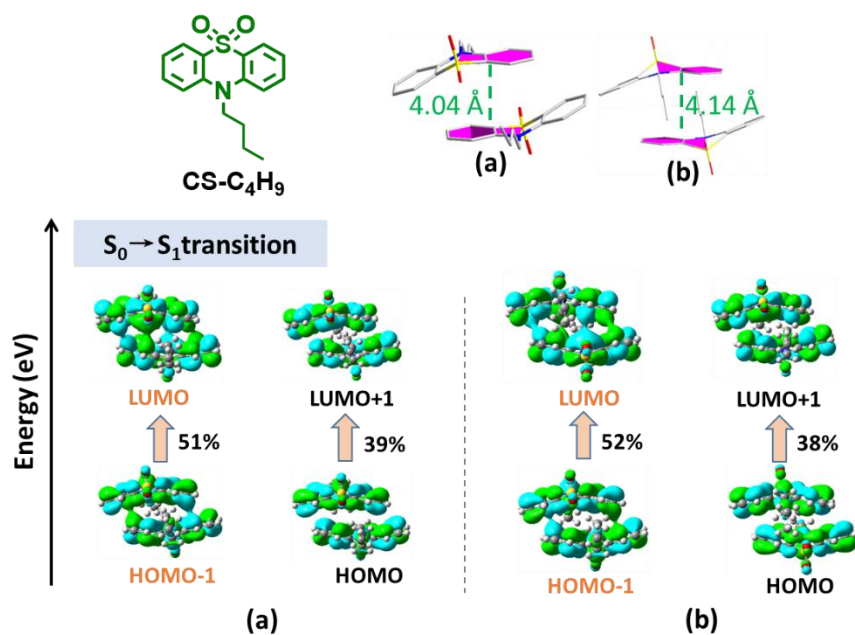

**Figure S16** The energy transitions for  $S_0$  to  $S_1$  state of CS-C<sub>4</sub>H<sub>9</sub> estimated by TD-DFT calculations at the m062x/6-31g\* level and the frontier molecular orbitals with intermolecular interaction of  $\pi$ -electron cloud labeled in orange.

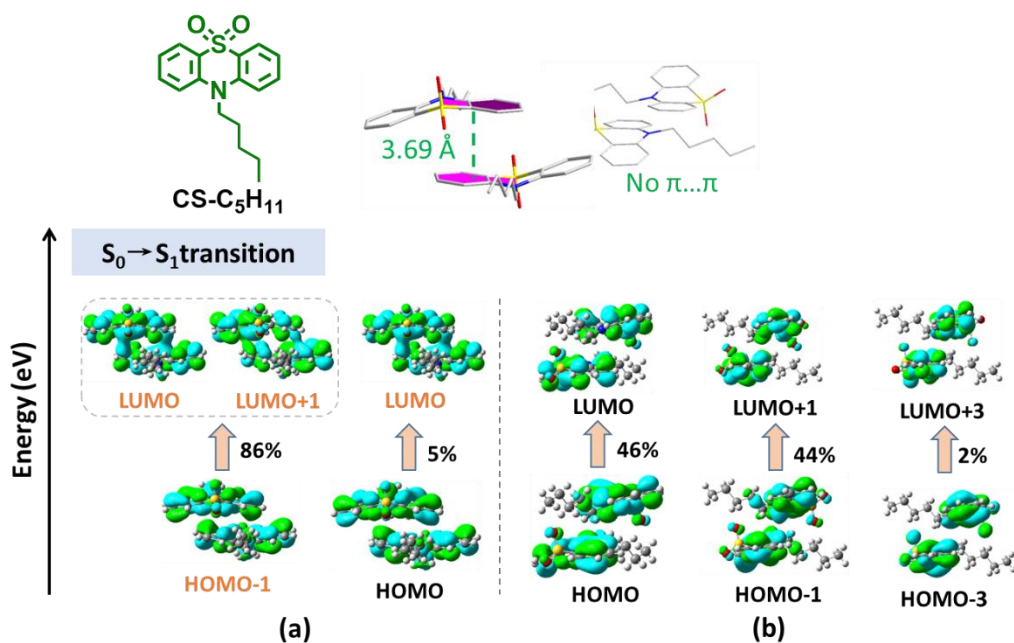

**Figure S17** The energy transitions for  $S_0$  to  $S_1$  state of CS-C<sub>5</sub>H<sub>11</sub> estimated by TD-DFT calculations at the m062x/6-31g\* level and the frontier molecular orbitals with intermolecular interaction of  $\pi$ -electron cloud labeled in orange.

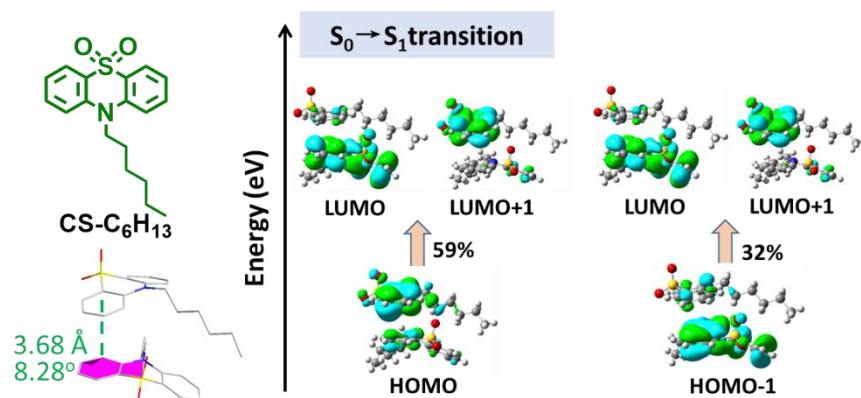

**Figure S18** The energy transitions for  $S_0$  to  $S_1$  state of  $CS-C_6H_{13}$  estimated by TD-DFT calculations at the m062x/6-31g\* level and the frontier molecular orbitals with intermolecular interaction of  $\pi$ -electron cloud labeled in orange.

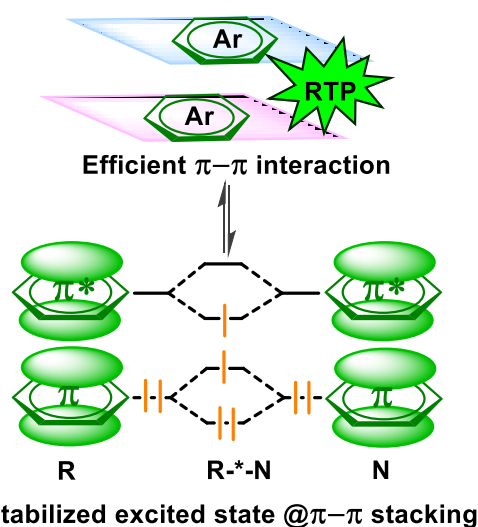

**Figure S19** The proposed RTP mechanism based on the classical perturbation theory.

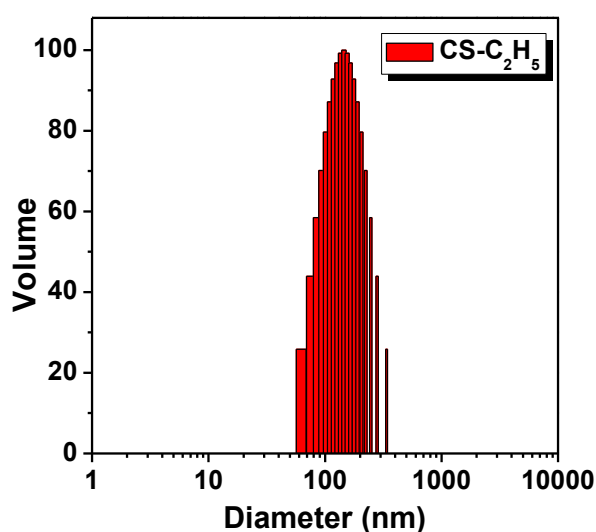

**Figure S20** Particle size distribution of  $CS-C_2H_5$  NPs.

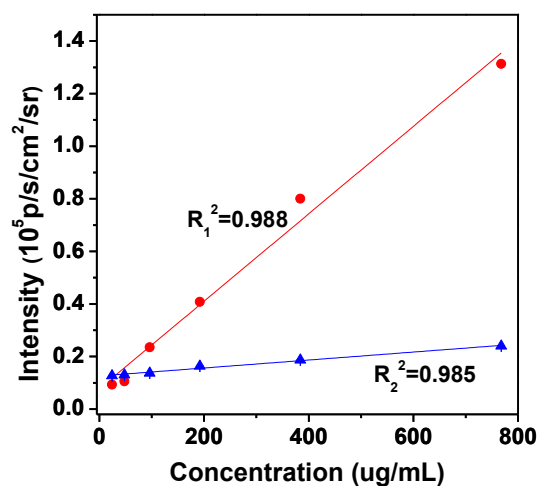

**Figure S21** The ultralong phosphorescence intensities as a function of the concentrations of CS-C<sub>3</sub>H<sub>7</sub> and CS-C<sub>2</sub>H<sub>5</sub>.

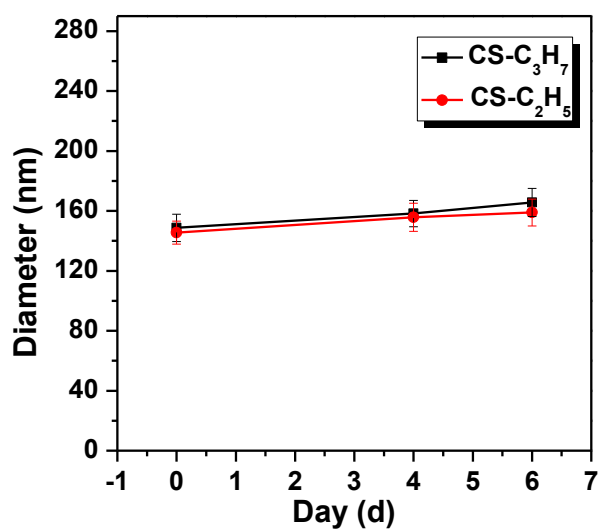

**Figure S22** The diameters of CS-C<sub>3</sub>H<sub>7</sub> and CS-C<sub>2</sub>H<sub>5</sub> NPs after storage at 4 °C in dark for 4 and 6 days, respectively.

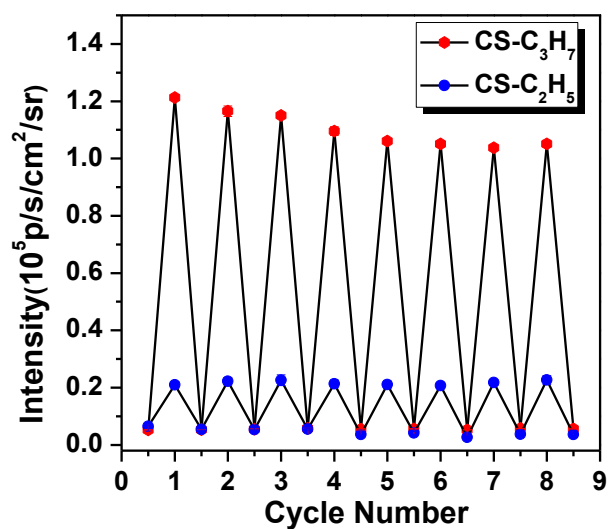

**Figure S23** The ultralong phosphorescence intensities of CS-C<sub>3</sub>H<sub>7</sub> and CS-C<sub>2</sub>H<sub>5</sub> NPs solutions as a function of the cycle number of light activation.

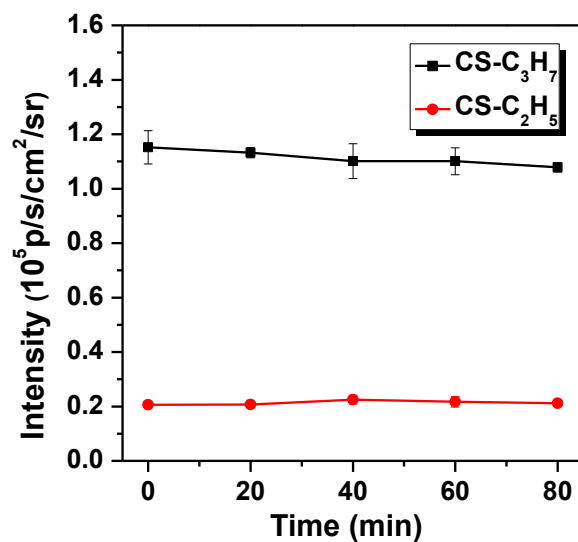

**Figure S24** The ultralong phosphorescence intensities of CS-C<sub>3</sub>H<sub>7</sub> and CS-C<sub>2</sub>H<sub>5</sub> NPs under continuous light irradiation for 80 min (the power density: 10 mW cm<sup>-2</sup>).

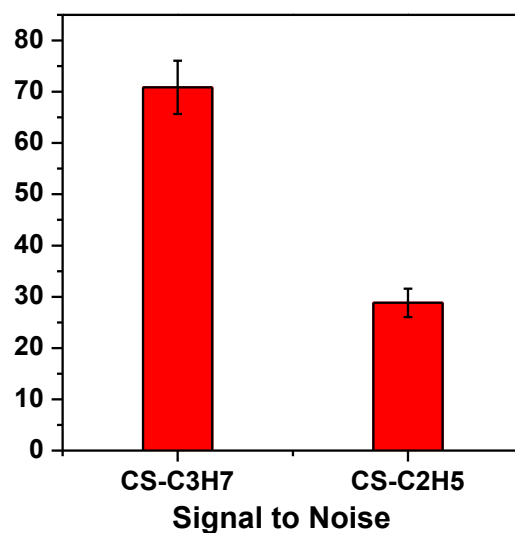

**Figure S25** The signal to noise of CS-C<sub>3</sub>H<sub>7</sub> and CS-C<sub>2</sub>H<sub>5</sub> NPs for *in vivo* imaging.

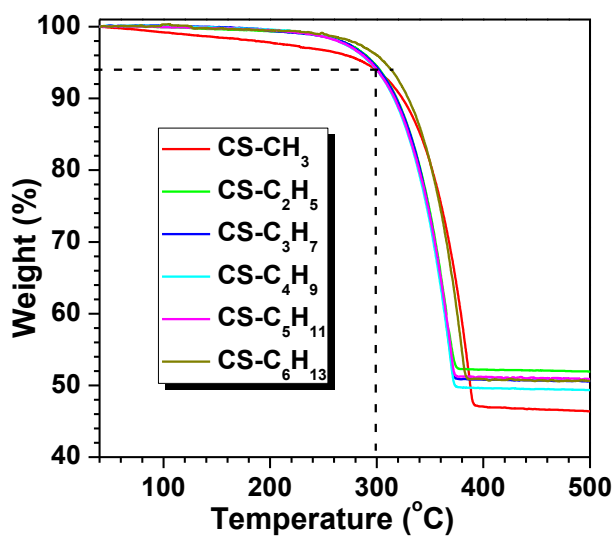

**Figure S26** TGA curves of the six target compounds.

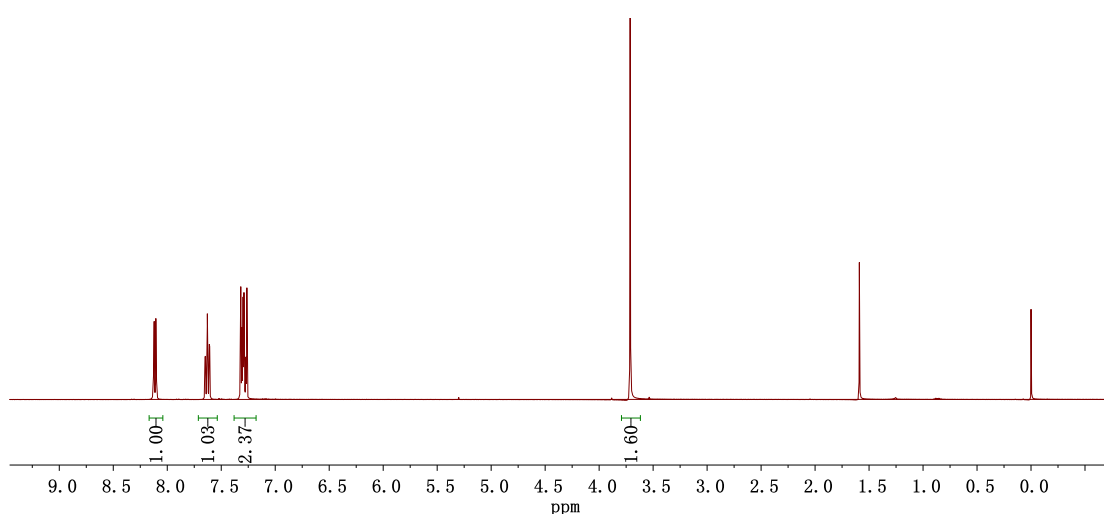

**Figure S27** <sup>1</sup>H NMR spectrum of CS-CH<sub>3</sub>.

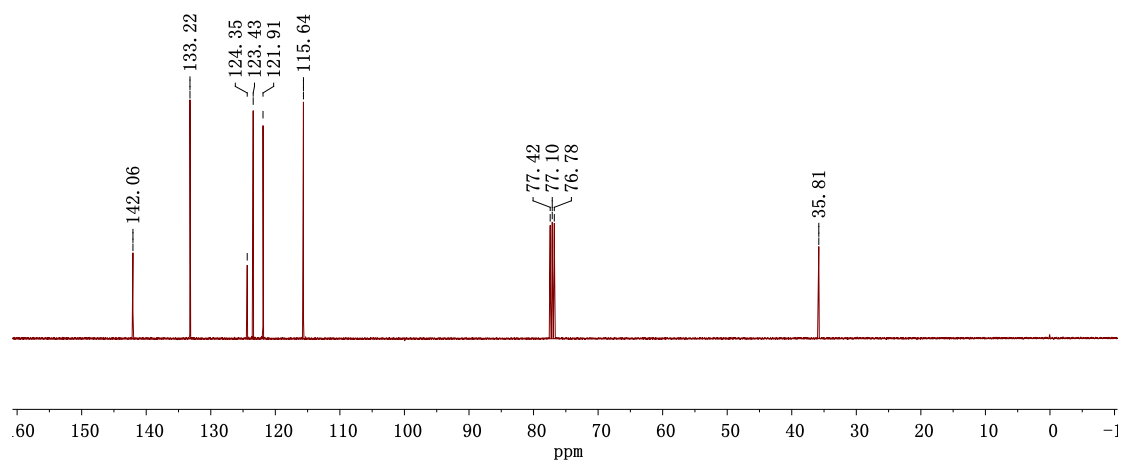

**Figure S28**  $^{13}\text{C}$  NMR spectrum of CS- $\text{CH}_3$ .

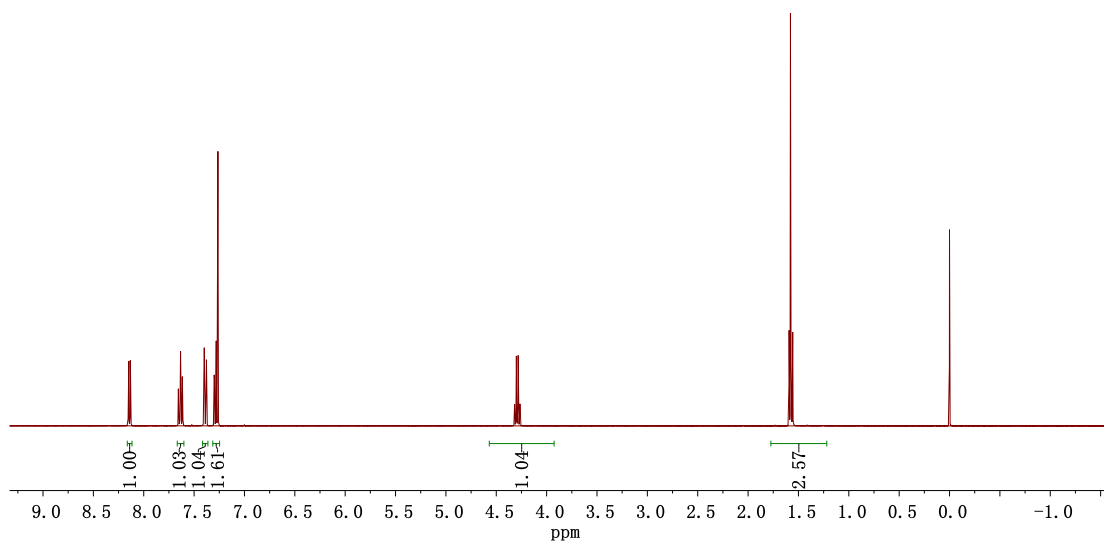

**Figure S29**  $^1\text{H}$  NMR spectrum of CS- $\text{C}_2\text{H}_5$ .

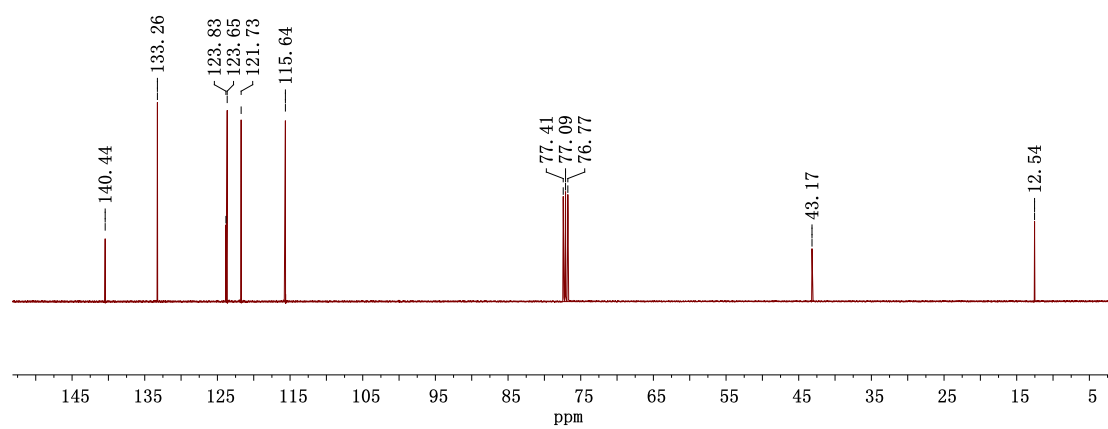

**Figure S30**  $^{13}\text{C}$  NMR spectrum of CS- $\text{C}_2\text{H}_5$ .



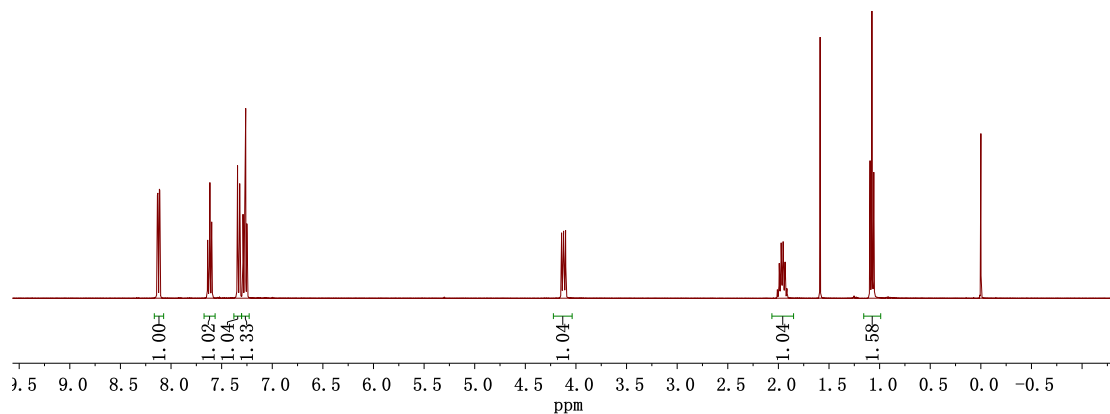

**Figure S31**  $^1\text{H}$  NMR spectrum of  $\text{CS-C}_3\text{H}_7$ .

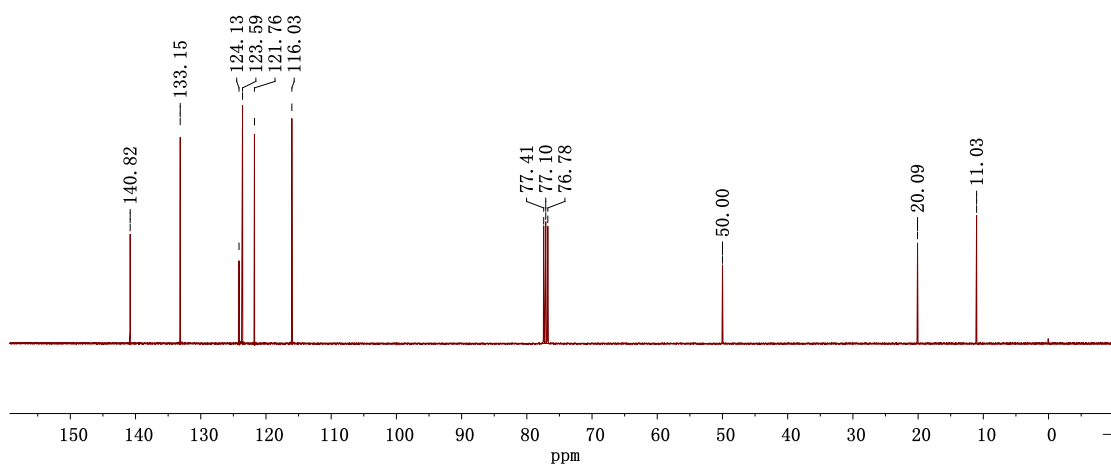

**Figure S32**  $^{13}\text{C}$  NMR spectrum of  $\text{CS-C}_3\text{H}_7$ .

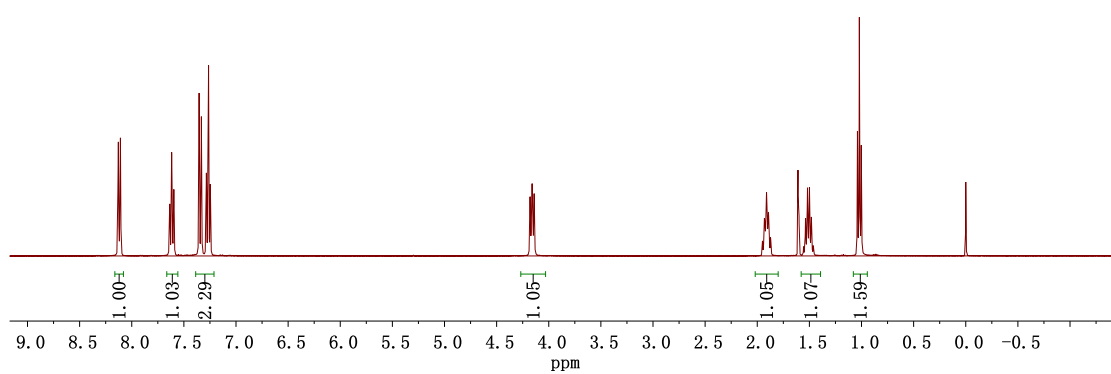

**Figure S33**  $^1\text{H}$  NMR spectrum of  $\text{CS-C}_4\text{H}_9$ .

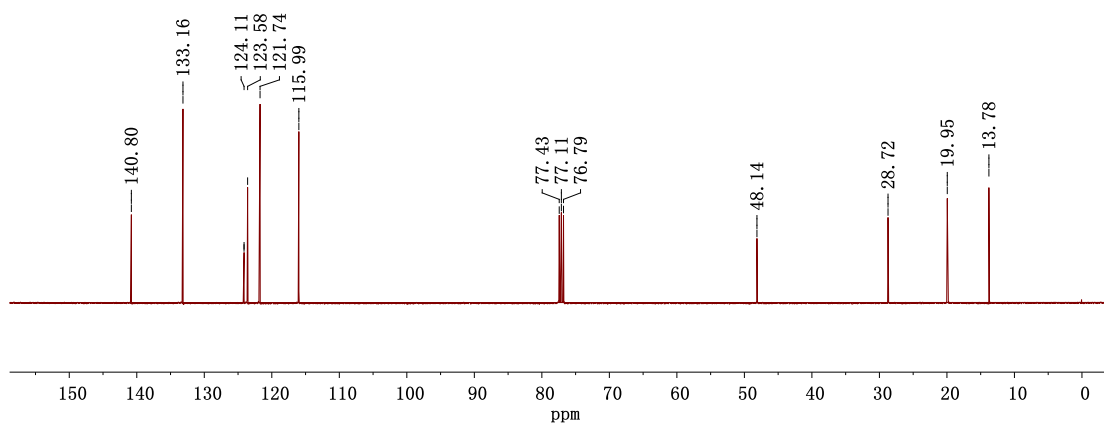

**Figure S34**  $^{13}\text{C}$  NMR spectrum of CS-C<sub>4</sub>H<sub>9</sub>.

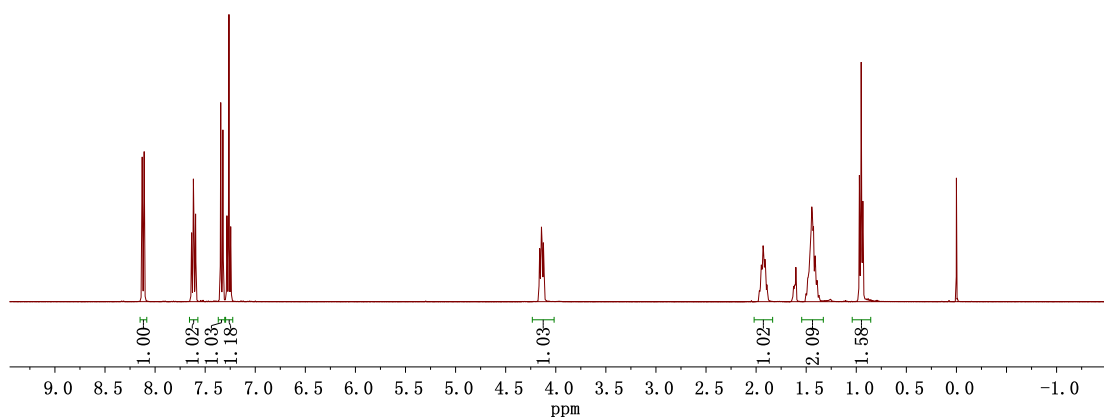

**Figure S35**  $^1\text{H}$  NMR spectrum of CS-C<sub>5</sub>H<sub>11</sub>.

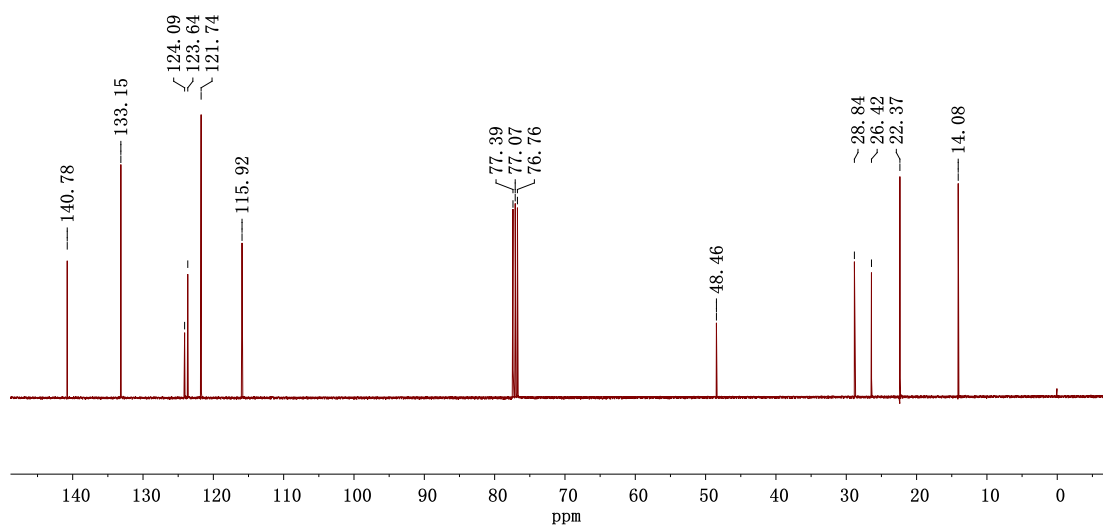

**Figure S36**  $^{13}\text{C}$  NMR spectrum of CS-C<sub>5</sub>H<sub>11</sub>.

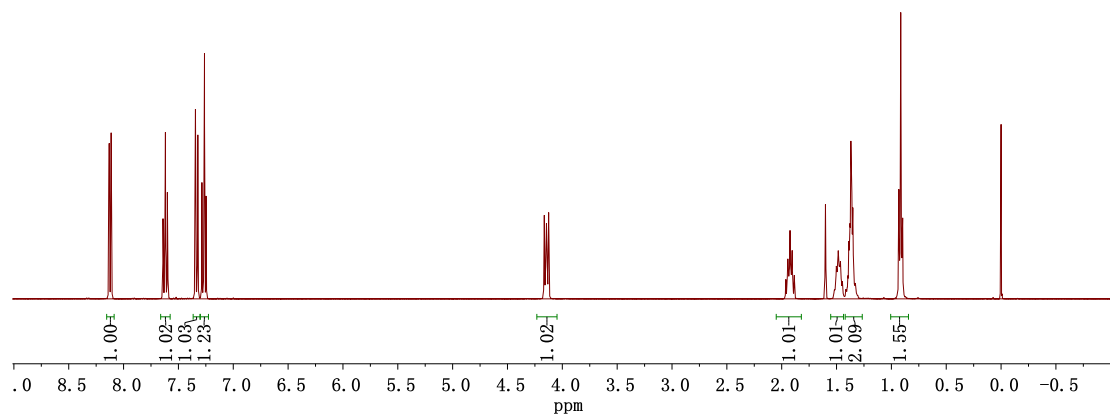

Figure S37  $^1\text{H}$  NMR spectrum of CS- $\text{C}_6\text{H}_{13}$ .

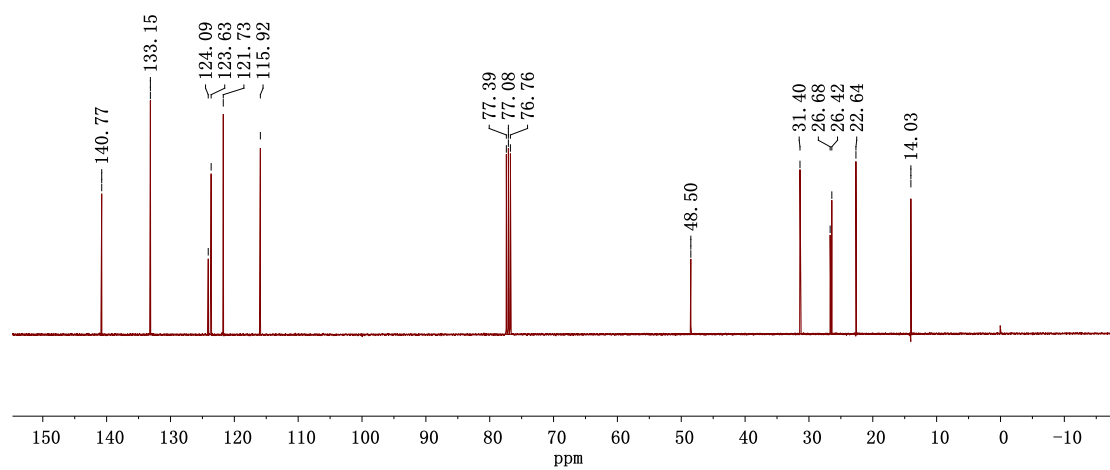

Figure S38  $^{13}\text{C}$  NMR spectrum of CS- $\text{C}_6\text{H}_{13}$ .

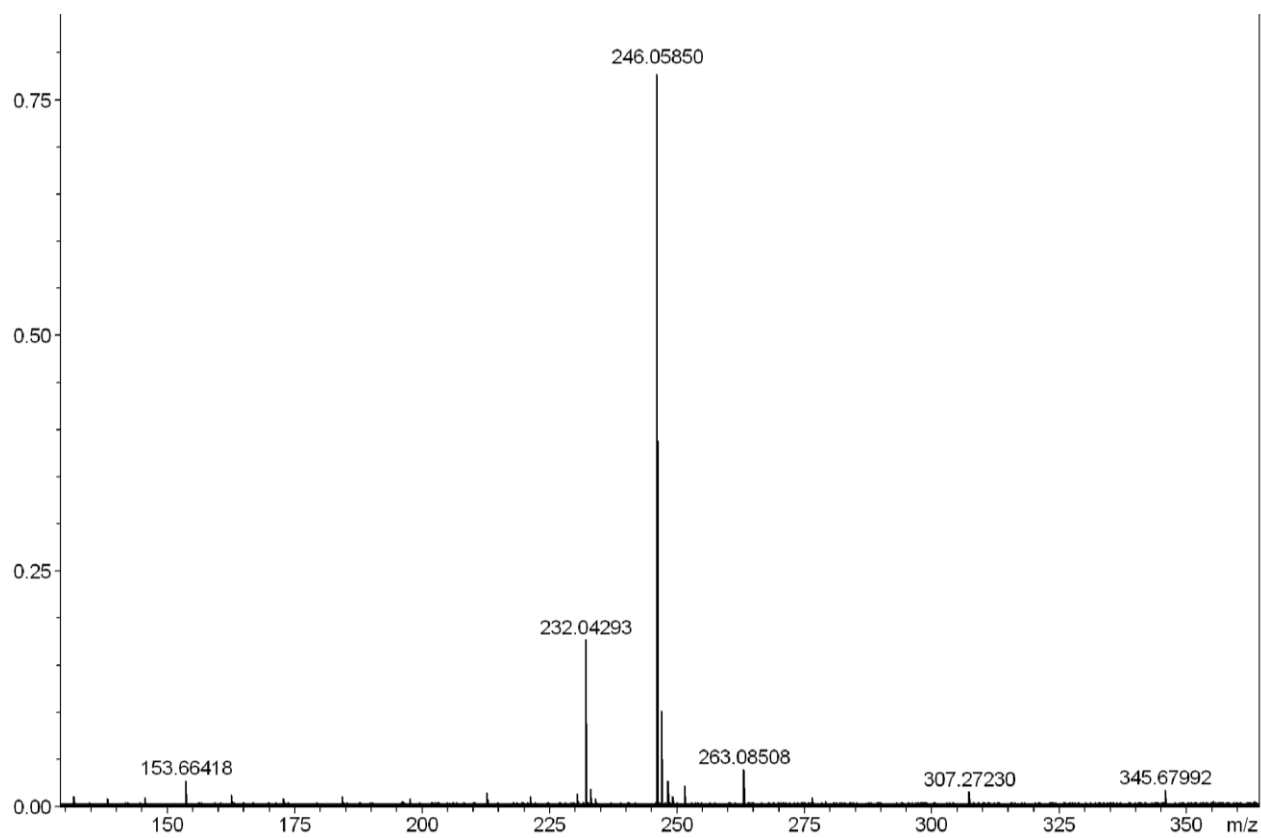

**Figure S39** HRMS spectrum of CS-CH<sub>3</sub>.

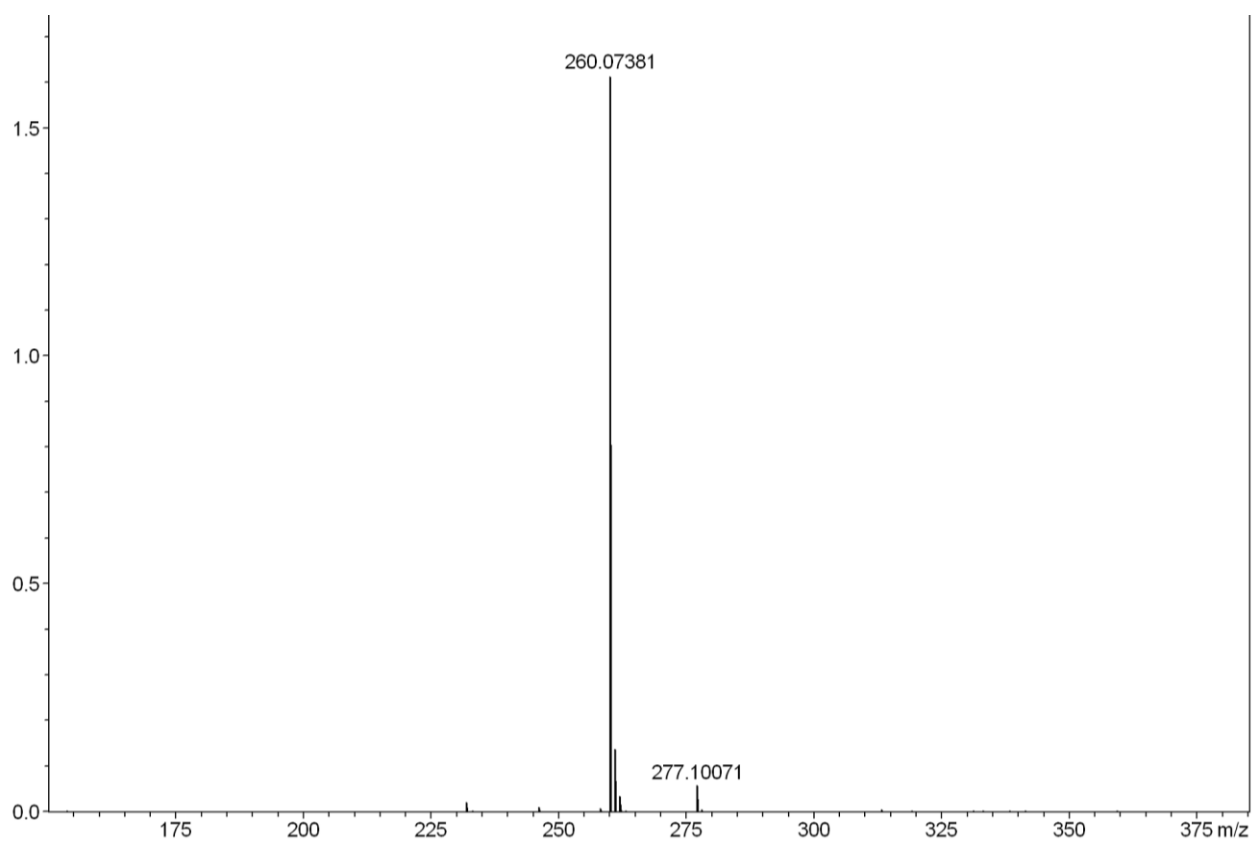

**Figure S40** HRMS spectrum of CS-C<sub>2</sub>H<sub>5</sub>.

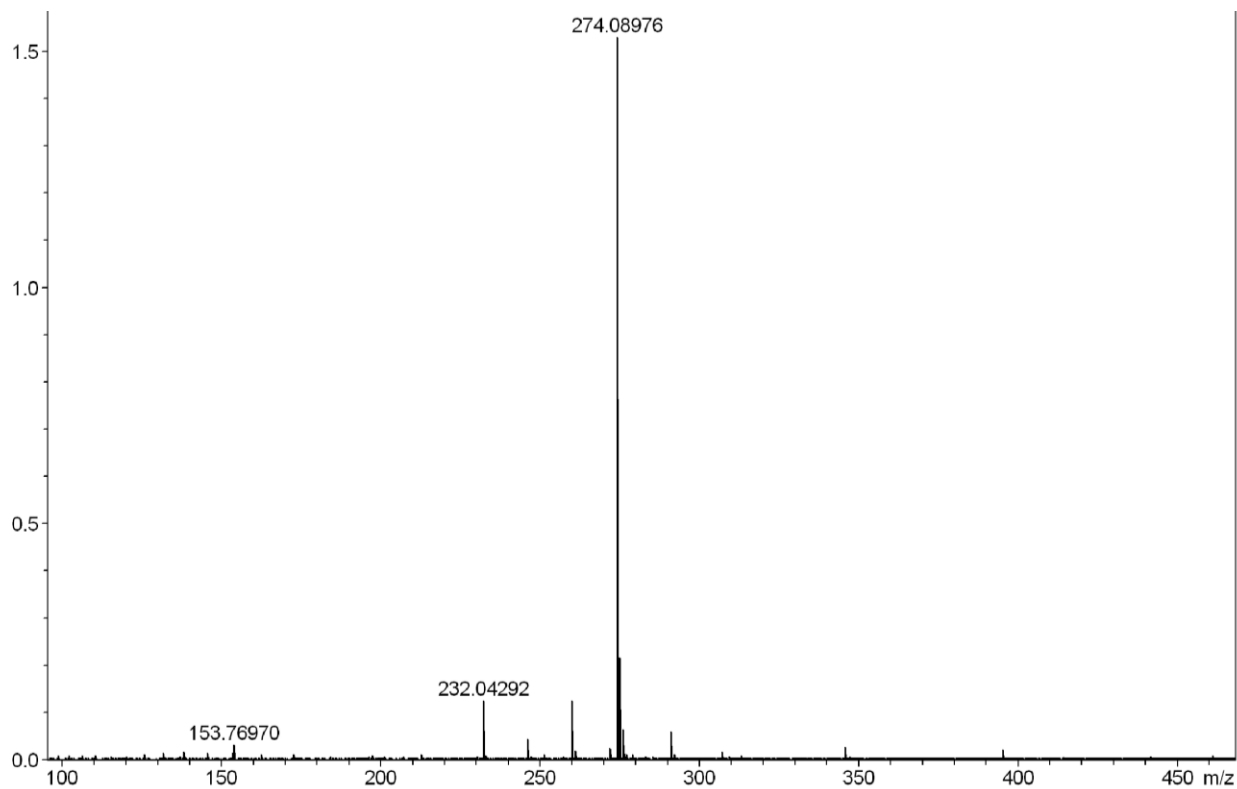

**Figure S41** HRMS spectrum of CS-C<sub>3</sub>H<sub>7</sub>.

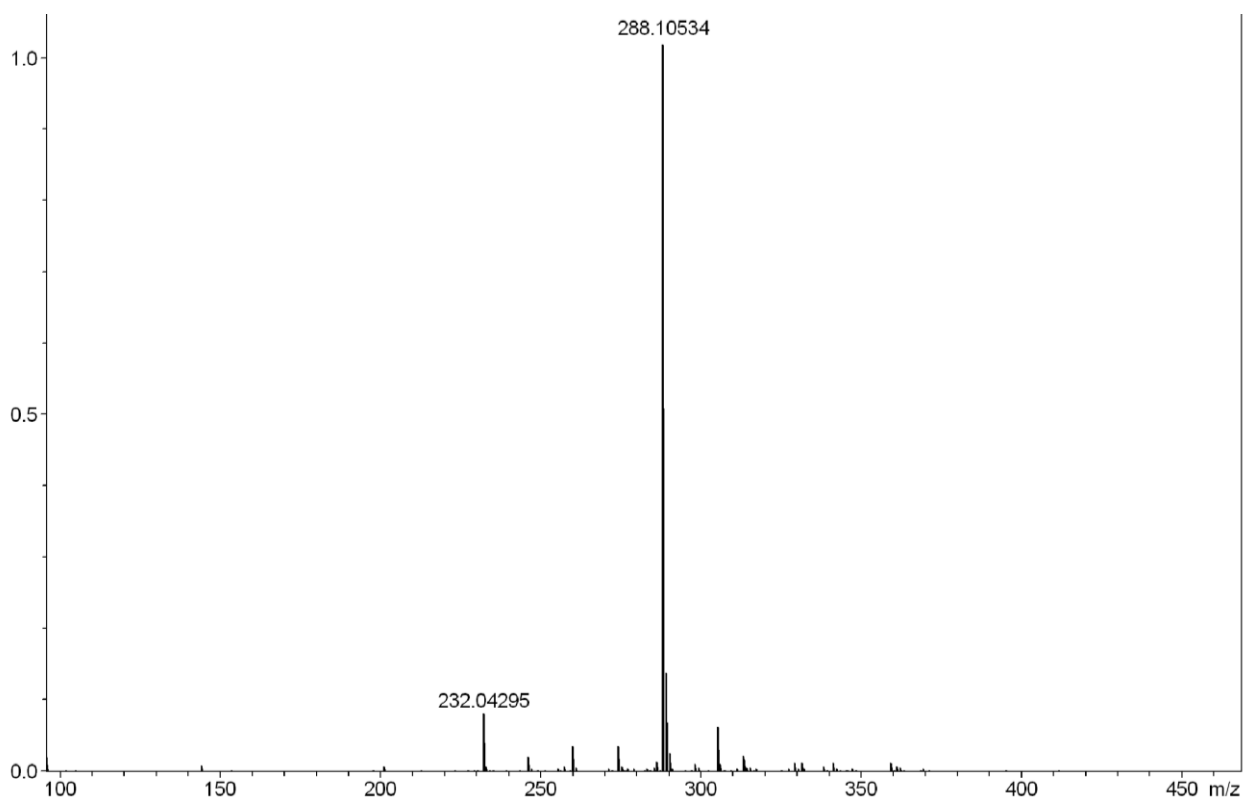

**Figure S42** HRMS spectrum of CS-C<sub>4</sub>H<sub>9</sub>.

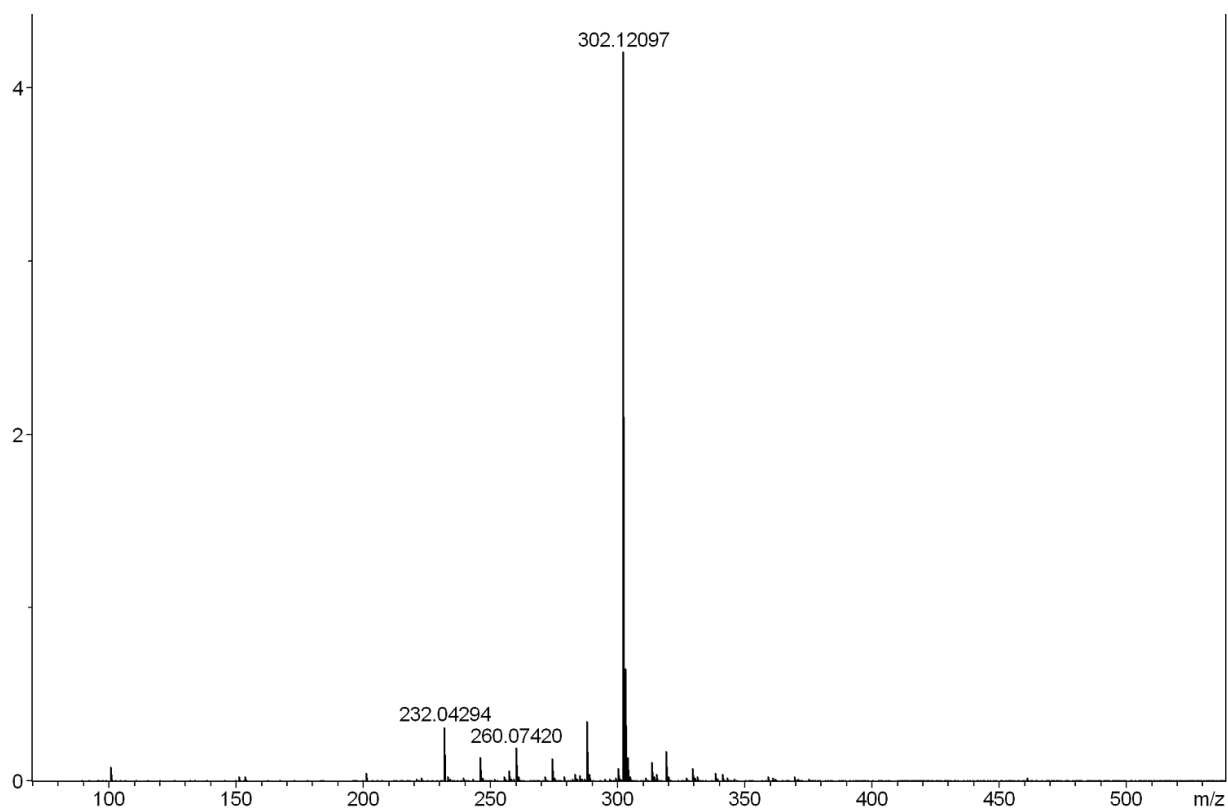

**Figure S43** HRMS spectrum of CS-C<sub>5</sub>H<sub>11</sub>.

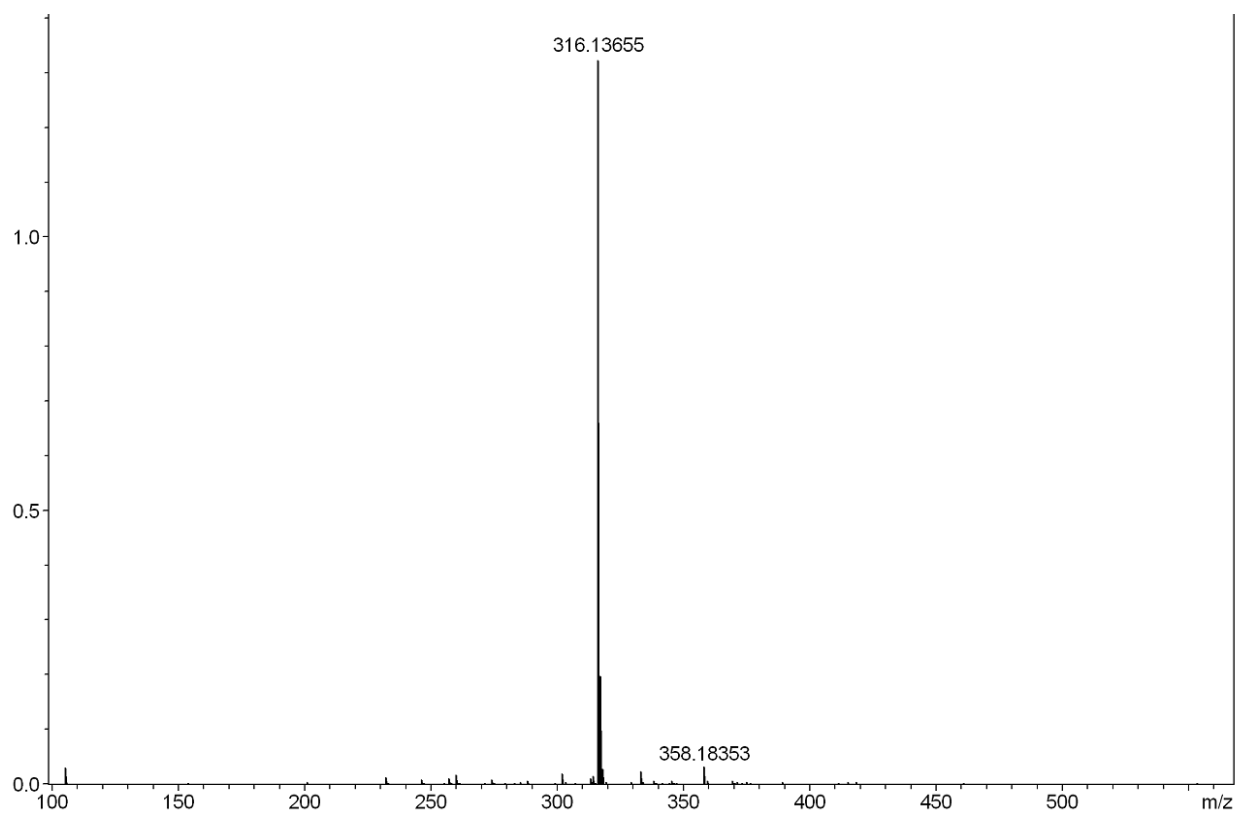

**Figure S44** HRMS spectrum of CS-C<sub>6</sub>H<sub>13</sub>.
